# Supplementary material for: Probing the kinetics of lipid membrane formation and the interaction of a nontoxic and a toxic amyloid with plasmon waveguide resonance
Source: Royal Society of Chemistry journal article supplement (doi:10.1039/c4cc00571f), 2014-01-01
Supplement: c4cc00571f1.pdf [file c4cc00571f1.pdf]

### Supplementary Information

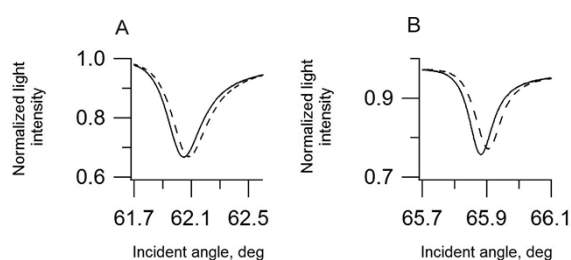

Figure 1. Interaction of amyloid peptide WT with a DOPG bilayer. PWR spectra of a DOPG bilayer alone (solid line) and after addition of peptide WT at equilibrium (dashed line) for *p*- (A) and *s*-pol (B) light.

Studies of second derivative of the intensity as a function of the incident angle were performed using FeatureJ of ImageJ that was developed at the Biomedical Imaging Group of the Swiss Federal Institute of Technology in Lausanne (EPFL, Switzerland) and a Plugin developed by the National Institute of Health (Bethesda, USA).
